# Supplementary material
Source: PubMed Central journal article supplement (PMC4297589)
Supplement: NIHMS615037-supplement-01.pdf [file NIHMS615037-supplement-01.pdf]

**Supplemental Table 1: Characteristics of study population, stratifying by diagnosis of colorectal cancer**

| Characteristic                                                    | No colorectal cancer<br>(n = 6.669)<br>% | Colorectal cancer<br>(n = 154)<br>% | p-value |
|-------------------------------------------------------------------|------------------------------------------|-------------------------------------|---------|
| Median age (in years) (IQR)                                       | 48 (34 – 62)                             | 57 (45 – 66)                        | < 0.001 |
| Median age at first IBD diagnosis code (SD) (in years)            | 38 (26 – 53)                             | 51 (39 – 62)                        | < 0.001 |
| Duration of follow-up after first IBD code [Median (IQR)] (years) | 8 (5 – 12)                               | 5 (2 – 8)                           | < 0.001 |
| Sex                                                               |                                          |                                     | 0.002   |
| Female                                                            | 55                                       | 42                                  |         |
| Male                                                              | 45                                       | 58                                  |         |
| Race                                                              |                                          |                                     | 0.90    |
| White                                                             | 88                                       | 87                                  |         |
| Non-white                                                         | 12                                       | 13                                  |         |
| Type of IBD                                                       |                                          |                                     |         |
| Crohn's disease                                                   | 48                                       | 46                                  |         |
| Ulcerative colitis                                                | 52                                       | 54                                  |         |
| Primary Sclerosing Cholangitis                                    | 2                                        | 8                                   | 0.001   |
| Ever immunomodulator use‡                                         | 29                                       | 21                                  | 0.04    |
| Ever biologic use‡                                                | 14                                       | 10                                  | 0.14    |
| Died                                                              | 5                                        | 29                                  | < 0.001 |

IQR – interquartile range; IBD – inflammatory bowel diseases;

‡ Immunomodulators comprise azathioprine, 6-mercaptopurine (6-MP), methotrexate) while biologics include infliximab, adalimumab, and certolizumab pegol
